# Supplementary material for: Evaluating cognition in individuals with Huntington disease: Neuro-QoL cognitive functioning measures
Source: Springer Nature journal article supplement (doi:10.1007/s11136-017-1755-6), 2017-12-08
Supplement: MOESM2 [file 15291212]

**Applied Cognition- General Concerns**

**Please respond to each question or statement by marking one box per row.**

|  | **In the past 7 days…** | **Never** | **Rarely (once)** | **Sometimes (2-3 times)** | **Often (once a day)** | **Very often (several times a day)** |
| --- | --- | --- | --- | --- | --- | --- |
| NQCOG64 | I had to read something several times to understand it……………………………... |   5 |   4 |   3 |   2 |   1 |
|  |  |  |  |  |  |  |
| NQCOG65 | I had trouble keeping track of what I was doing if I was interrupted………………... |   5 |   4 |   3 |   2 |   1 |
|  |  |  |  |  |  |  |
| NQCOG66 | I had difficulty doing more than one thing at a time………………………………….. |   5 |   4 |   3 |   2 |   1 |
|  |  |  |  |  |  |  |
| NQCOG68 | I had trouble remembering new information, like phone numbers or simple instructions……………………….. |   5 |   4 |   3 |   2 |   1 |
|  |  |  |  |  |  |  |
| NQCOG72 | I had trouble thinking clearly……………. |   5 |   4 |   3 |   2 |   1 |
|  |  |  |  |  |  |  |
| NQCOG75 | My thinking was slow…………………… |   5 |   4 |   3 |   2 |   1 |
|  |  |  |  |  |  |  |
| NQCOG77 | I had to work really hard to pay attention or I would make a mistake………………. |   5 |   4 |   3 |   2 |   1 |
|  |  |  |  |  |  |  |
| NQCOG80 | I had trouble concentrating………………. |   5 |   4 |   3 |   2 |   1 |
|  |  |  |  |  |  |  |
| NQCOG46 | I made simple mistakes more easily……... |   5 |   4 |   3 |   2 |   1 |
|  |  |  |  |  |  |  |
| NQCOG53 | Words I wanted to use seemed to be on the “tip of my tongue”…………………… |   5 |   4 |   3 |   2 |   1 |
|  |  |  |  |  |  |  |
| NQCOG67 | I had trouble remembering whether I did things I was supposed to do, like taking a medicine or buying something I needed… |   5 |   4 |   3 |   2 |   1 |
|  |  |  |  |  |  |  |
| NQCOG69 | I walked into a room and forgot what I meant to get or do there………………….. |   5 |   4 |   3 |   2 |   1 |
|  |  |  |  |  |  |  |
| NQCOG70 | I had trouble remembering the name of a familiar person…………………………… |   5 |   4 |   3 |   2 |   1 |

|  | **In the past 7 days…** | **Never** | **Rarely (once)** | **Sometimes (2-3 times)** | **Often (once a day)** | **Very often (several times a day)** |
| --- | --- | --- | --- | --- | --- | --- |
| NQCOG73 | I reacted slowly to things that were said or done……………………………………… |   5 |   4 |   3 |   2 |   1 |
|  |  |  |  |  |  |  |
| NQCOG74 | I had trouble forming thoughts…………. |   5 |   4 |   3 |   2 |   1 |
|  |  |  |  |  |  |  |
| NQCOG83 | I had trouble getting started on very simple tasks……………………………… |   5 |   4 |   3 |   2 |   1 |
|  |  |  |  |  |  |  |
| NQCOG84 | I had trouble making decisions…………... |   5 |   4 |   3 |   2 |   1 |
|  |  |  |  |  |  |  |
| NQCOG86 | I had trouble planning out steps of a task... |   5 |   4 |   3 |   2 |   1 |
